# Supplementary material for: αグロビン遺伝子の終止コドンに変異を持つαサラセミア様異常ヘモグロビン症, Hb Constant Springの遺伝子解析
Source: PLOS journal article supplement (doi:10.1371/journal.pcbi.1000112), 2004-01-01
Supplement: S1 (10.1371/journal.pcbi.1000112.s001) [file journal.pcbi.1000112.s001]

301 Moved Permanently

# Moved Permanently

The document has moved here.

---

Apache Server at www.ploscompbiol.org Port 80
